# Supplementary material for: Transcriptome Profiling Reveals Candidate Genes Related to Stipe Gradient Elongation of Flammulina filiformis
Source: MDPI journal article supplement (doi:10.3390/jof9010064), 2022-12-31
Supplement: s1 [file s1]

Table S1 Primers used in PCR

| Gene              | Forward sequence (5'-3') | Reverse sequence (5'-3') |
|-------------------|--------------------------|--------------------------|
| <i>FfELO2</i>     | TGTCAAGCGAAAGAAGATCA     | CCCACTATGTGTCCAGAAAA     |
| <i>FfHSD17B12</i> | ACAAGTATCTCTGATTCCGC     | GTACTTCTATGACGTGGACC     |
| <i>FfPHS1</i>     | TTTAAGCACCGTCGAAGTAA     | CGAAGTACATCAGTGGTCAT     |
| <i>FfTER</i>      | AGAAAGGACCAAGGAATGAC     | GTACTATGGTACGCTCGTTT     |
| <i>FfTHEM4</i>    | ACGCCTACCGATACATAAAC     | TGGAAACGGTCTTGAGTAAG     |
