# Supplementary material for: Transcriptome Profiling Reveals Candidate Genes Related to Stipe Gradient Elongation of Flammulina filiformis
Source: MDPI journal article supplement (doi:10.3390/jof9010064), 2022-12-31
Supplement: s1 [file s1]

Table S2 Primers used in qRT-PCR

| Gene              | Forward sequence (5'-3')  | Reverse sequence (5'-3')  |
|-------------------|---------------------------|---------------------------|
| <i>FfELO2</i>     | CTTGCTGCTGCTCGTGCTCAT     | AATGCGGTGGCGGAATGATGG     |
| <i>FfHSD17B12</i> | CCGAGGAAGTCAAGCAGCACAA    | CAGGAAGTGGAAGTAGCAGGTTAGG |
| <i>FfPHS1</i>     | GCCTTCCTCAACTACGCTACTCTC  | TTTGCCTTGGAACCCTTGGATGG   |
| <i>FfTER</i>      | CCCGTTTCCCACCTAAAGTCAAAGA | GTCTATCTCTCCGCCAGCACCTAA  |
| <i>FfTHEM4</i>    | GGTCACTGCGACGCTGAACTTG    | CCGCCTCCGCTATAGTCTTCTTGT  |
| <i>FfGPD</i>      | CCTCTGCTCACTTGAAGGGT      | GCGTTGGAGATGACTTTGAA      |
| <i>FfRAS</i>      | TCAATGCGACGAGTAAAGAGAGG   | CATAGGTCCCACATCTACATTTCG  |
